# Supplementary material for: In Silico Study of Polyunsaturated Fatty Acids as Potential SARS-CoV-2 Spike Protein Closed Conformation Stabilizers: Epidemiological and Computational Approaches
Source: MDPI journal article supplement (doi:10.3390/molecules26030711), 2021-01-29
Supplement: s1 [file s1]

Table S1. Epidemiological data COVID-19 and omega 3 intake by source, country, region and globally \*

| Excluded for analyses.<br>Incomplete data | Name                                  | WHO Region            | Seafood omega-3<br>mg/day (Uncertain Intervals) | Plant omega-3<br>mg/day (Uncertain Intervals) | Total omega-3 (seafood + plant)<br>mg/day | Cases - cumulative total | Cases - cumulative total per<br>1 million population | Deaths - cumulative total | Fatality rate      |
|-------------------------------------------|---------------------------------------|-----------------------|-------------------------------------------------|-----------------------------------------------|-------------------------------------------|--------------------------|------------------------------------------------------|---------------------------|--------------------|
|                                           | <b>Global</b>                         |                       | <b>163 (154, 172)</b>                           | <b>1371 (1299, 1465)</b>                      | <b>1534.0</b>                             | <b>6246837</b>           | <b>8050.517041</b>                                   | <b>1465144</b>            | <b>2.331367333</b> |
|                                           | Afghanistan                           | Eastern Mediterranean | 30 (18, 49)                                     | 665 (325, 1181)                               | 695.0                                     | 46498                    | 1194.45                                              | 1774                      | 3.815217859        |
|                                           | Albania                               | Europe                | 47 (26, 75)                                     | 563 (266, 1075)                               | 610.0                                     | 38182                    | 13267.79                                             | 810                       | 2.121418469        |
|                                           | Algeria                               | Africa                | 42 (27, 64)                                     | 2180 (1059, 4027)                             | 2222.0                                    | 83199                    | 1897.31                                              | 2431                      | 2.921910119        |
| Excluded                                  | American Samoa                        | Western Pacific       |                                                 |                                               |                                           |                          |                                                      | 0                         | 0                  |
|                                           | Andorra                               | Europe                | 324 (192, 509)                                  | 633 (311, 1165)                               | 957.0                                     | 6745                     | 87296.96                                             | 76                        | 1.126760563        |
|                                           | Angola                                | Africa                | 87 (49, 141)                                    | 2195 (1048, 3993)                             | 2282.0                                    | 15139                    | 460.62                                               | 348                       | 2.298698725        |
| Excluded                                  | Anguilla                              | Americas              |                                                 |                                               |                                           |                          |                                                      | 0                         | 0                  |
|                                           | Antigua and Barbuda                   | Americas              | 310 (166, 510)                                  | 1059 (538, 1955)                              | 1369.0                                    | 141                      | 1439.82                                              | 4                         | 2.836879453        |
|                                           | Argentina                             | Americas              | 48 (27, 77)                                     | 1304 (653, 2344)                              | 1352.0                                    | 1418807                  | 31392.47                                             | 38473                     | 2.71164436         |
|                                           | Armenia                               | Europe                | 41 (24, 68)                                     | 466 (231, 850)                                | 507.0                                     | 135967                   | 45884.53                                             | 2193                      | 1.612891363        |
| Excluded                                  | Aruba                                 | Americas              |                                                 |                                               |                                           |                          |                                                      | 45                        | 0.93013642         |
|                                           | Australia                             | Western Pacific       | 286 (271, 302)                                  | 914 (458, 1658)                               | 1200.0                                    | 27904                    | 1094.28                                              | 908                       | 3.254013761        |
|                                           | Austria                               | Europe                | 184 (110, 294)                                  | 738 (359, 1372)                               | 922.0                                     | 280530                   | 31147.86                                             | 2983                      | 1.063344384        |
|                                           | Azerbaijan                            | Europe                | 37 (24, 59)                                     | 342 (161, 660)                                | 379.0                                     | 121175                   | 11951.27                                             | 1392                      | 2.184512325        |
|                                           | Bahamas                               | Americas              | 169 (100, 275)                                  | 405 (192, 763)                                | 574.0                                     | 7517                     | 19115.36                                             | 163                       | 2.168419252        |
|                                           | Bahrain                               | Eastern Mediterranean | 52 (29, 86)                                     | 1451 (684, 2694)                              | 1503.0                                    | 86956                    | 51103.24                                             | 341                       | 0.392152353        |
|                                           | Bangladesh                            | South-East Asia       | 47 (34, 61)                                     | 431 (203, 759)                                | 478.0                                     | 464932                   | 2823.08                                              | 6644                      | 1.42902618         |
|                                           | Barbados                              | Americas              | 1986 (1623, 2391)                               | 165 (152, 177)                                | 2151.0                                    | 276                      | 960.42                                               | 7                         | 2.536231884        |
|                                           | Belarus                               | Europe                | 116 (67, 191)                                   | 944 (455, 1763)                               | 1060.0                                    | 136647                   | 14461.04                                             | 1158                      | 0.847439022        |
|                                           | Belgium                               | Europe                | 281 (247, 323)                                  | 590 (298, 1063)                               | 871.0                                     | 577249                   | 49807.4                                              | 16645                     | 2.883504346        |
|                                           | Belize                                | Americas              | 73 (43, 113)                                    | 490 (249, 881)                                | 563.0                                     | 5743                     | 14443.15                                             | 147                       | 1.72697256         |
|                                           | Benin                                 | Africa                | 75 (44, 122)                                    | 520 (260, 946)                                | 595.0                                     | 3015                     | 248.7                                                | 43                        | 1.426202322        |
| Excluded                                  | Bermuda                               | Americas              |                                                 |                                               |                                           |                          |                                                      | 9                         | 3.461538462        |
|                                           | Bhutan                                | South-East Asia       | 23 (14, 37)                                     | 460 (231, 846)                                | 483.0                                     | 410                      | 531.36                                               | 0                         | 0                  |
|                                           | Bolivia (Plurinational State of)      | Americas              | 16 (8, 26)                                      | 545 (267, 1007)                               | 561.0                                     | 144622                   | 12389.42                                             | 8952                      | 6.18992961         |
| Excluded                                  | Bonaire, Sint Eustatius and Saba      | Americas              |                                                 |                                               |                                           |                          |                                                      | 3                         | 1.851851852        |
|                                           | Bosnia and Herzegovina                | Europe                | 47 (26, 75)                                     | 563 (266, 1075)                               | 610.0                                     | 87901                    | 26792.4                                              | 2681                      | 3.050022184        |
|                                           | Botswana                              | Africa                | 10 (6, 16)                                      | 387 (187, 708)                                | 397.0                                     | 9992                     | 4248.97                                              | 31                        | 0.310248199        |
|                                           | Brazil                                | Americas              | 57 (54, 60)                                     | 1747 (1656, 1846)                             | 1804.0                                    | 6314740                  | 29708.12                                             | 172833                    | 5.076937254        |
| Excluded                                  | British Virgin Islands                | Americas              |                                                 |                                               |                                           |                          |                                                      | 1                         | 1.369863014        |
|                                           | Brunei Darussalam                     | Western Pacific       | 239 (140, 381)                                  | 290 (138, 548)                                | 529.0                                     | 150                      | 342.87                                               | 3                         | 2                  |
|                                           | Bulgaria                              | Europe                | 119 (93, 149)                                   | 1444 (719, 2752)                              | 1563.0                                    | 145300                   | 20911.15                                             | 4035                      | 2.777013076        |
|                                           | Burkina Faso                          | Africa                | 22 (15, 31)                                     | 498 (239, 925)                                | 520.0                                     | 2886                     | 138.06                                               | 68                        | 2.356202356        |
|                                           | Burundi                               | Africa                | 25 (14, 41)                                     | 164 (73, 306)                                 | 189.0                                     | 689                      | 57.94                                                | 1                         | 0.145137881        |
|                                           | Cabo Verde                            | Africa                | 120 (69, 189)                                   | 1232 (594, 2288)                              | 1352.0                                    | 10526                    | 18932.1                                              | 104                       | 0.988029641        |
|                                           | Cameroon                              | Western Pacific       | 680 (395, 1148)                                 | 215 (105, 386)                                | 895.0                                     | 326                      | 19.5                                                 | 0                         | 0                  |
|                                           | Cameroun                              | Africa                | 142 (80, 240)                                   | 503 (246, 915)                                | 645.0                                     | 24487                    | 922.44                                               | 441                       | 1.800955609        |
|                                           | Canada                                | Americas              | 92 (82, 103)                                    | 2085 (1925, 2249)                             | 2177.0                                    | 370278                   | 9810.73                                              | 12032                     | 3.249450413        |
| Excluded                                  | Cayman Islands                        | Americas              |                                                 |                                               |                                           |                          |                                                      | 2                         | 0.729927007        |
|                                           | Central African Republic              | Africa                | 38 (21, 62)                                     | 1529 (717, 2863)                              | 1567.0                                    | 4918                     | 1018.27                                              | 63                        | 1.28100854         |
|                                           | Chad                                  | Africa                | 72 (41, 113)                                    | 771 (358, 1468)                               | 843.0                                     | 1688                     | 102.76                                               | 101                       | 5.983412322        |
|                                           | Chile                                 | Americas              | 407 (226, 695)                                  | 1230 (615, 2141)                              | 1637.0                                    | 551743                   | 28862.59                                             | 15410                     | 2.792967015        |
|                                           | China                                 | Western Pacific       | 37 (13, 41)                                     | 3266 (1089, 3448)                             | 3303.0                                    | 8284                     | 9357.63                                              | 4750                      | 5.076937254        |
|                                           | Colombia                              | Americas              | 94 (86, 101)                                    | 510 (251, 889)                                | 604.0                                     | 1308376                  | 25713.48                                             | 36584                     | 2.796138113        |
|                                           | Comoros                               | Africa                | 243 (133, 408)                                  | 126 (58, 237)                                 | 369.0                                     | 611                      | 702.62                                               | 7                         | 1.145662848        |
|                                           | Congo                                 | Africa                | 148 (82, 249)                                   | 1067 (507, 1975)                              | 1215.0                                    | 5774                     | 1046.38                                              | 94                        | 1.62798753         |
| Excluded                                  | Cook Islands                          | Western Pacific       |                                                 |                                               |                                           |                          |                                                      | 0                         | 0                  |
|                                           | Costa Rica                            | Americas              | 54 (31, 87)                                     | 621 (311, 1156)                               | 675.0                                     | 137093                   | 26912.02                                             | 1690                      | 1.232739819        |
|                                           | Côte d'Ivoire                         | Africa                | 140 (83, 223)                                   | 205 (98, 382)                                 | 345.0                                     | 21331                    | 808.66                                               | 132                       | 0.618817683        |
|                                           | Croatia                               | Europe                | 145 (100, 203)                                  | 1196 (578, 2262)                              | 1341.0                                    | 31287.12                 | 80481                                                | 1786                      | 1.30510882         |
|                                           | Cuba                                  | Americas              | 62 (36, 102)                                    | 836 (411, 1579)                               | 898.0                                     | 8284                     | 731.37                                               | 135                       | 1.629647513        |
| Excluded                                  | Curaçao                               | Americas              |                                                 |                                               |                                           |                          |                                                      | 4                         | 0.169204738        |
|                                           | Cyprus                                | Europe                | 213 (149, 298)                                  | 741 (367, 1319)                               | 954.0                                     | 10565                    | 8750.5                                               | 49                        | 0.463795551        |
|                                           | Czechia                               | Europe                | 113 (65, 176)                                   | 1364 (650, 2562)                              | 1477.0                                    | 523298                   | 48865.34                                             | 8295                      | 1.585138869        |
|                                           | Democratic People's Republic of Korea | South-East Asia       | 23 (13, 37)                                     | 1899 (919, 3706)                              | 1922.0                                    | 0                        | 0                                                    | 0                         | 0                  |
|                                           | Democratic Republic of the Congo      | Africa                | 62 (36, 98)                                     | 382 (180, 687)                                | 444.0                                     | 12771                    | 142.59                                               | 333                       | 2.607470049        |
|                                           | Denmark                               | Europe                | 1225 (679, 2013)                                | 300 (142, 558)                                | 1525.0                                    | 80481                    | 13894.72                                             | 837                       | 1.039997018        |
|                                           | Djibouti                              | Eastern Mediterranean | 13 (2, 22)                                      | 640 (332, 1175)                               | 653.0                                     | 5679                     | 5747.98                                              | 61                        | 1.07413277         |
|                                           | Dominica                              | Americas              | 154 (84, 260)                                   | 485 (242, 905)                                | 639.0                                     | 85                       | 1180.7                                               | 0                         | 0                  |
|                                           | Dominican Republic                    | Americas              | 54 (33, 86)                                     | 1566 (774, 2952)                              | 1620.0                                    | 143988                   | 13273.34                                             | 2331                      | 1.618884907        |
|                                           | Ecuador                               | Americas              | 36 (21, 58)                                     | 1027 (516, 1903)                              | 1063.0                                    | 192685                   | 10921.3                                              | 13461                     | 6.986013442        |
|                                           | Egypt                                 | Eastern Mediterranean | 77 (49, 122)                                    | 568 (273, 1076)                               | 645.0                                     | 115911                   | 1132.67                                              | 6650                      | 5.737160408        |
|                                           | El Salvador                           | Americas              | 45 (26, 74)                                     | 453 (220, 795)                                | 498.0                                     | 38405                    | 5921.03                                              | 1114                      | 2.900663976        |
|                                           | Equatorial Guinea                     | Africa                | 94 (55, 157)                                    | 1381 (676, 2545)                              | 1475.0                                    | 5153                     | 3672.88                                              | 85                        | 1.649524549        |
|                                           | Eritrea                               | Africa                | 11 (6, 18)                                      | 406 (205, 749)                                | 417.0                                     | 577                      | 162.7                                                | 0                         | 0                  |
|                                           | Estonia                               | Europe                | 188 (162, 217)                                  | 1217 (615, 2261)                              | 1405.0                                    | 12308                    | 9278.31                                              | 118                       | 0.958726032        |
|                                           | Eswatini                              | Africa                | 18 (10, 29)                                     | 280 (135, 540)                                | 298.0                                     | 6419                     | 5532.84                                              | 122                       | 1.900607571        |
|                                           | Ethiopia                              | Africa                | 48 (28, 80)                                     | 240 (111, 437)                                | 288.0                                     | 110074                   | 957.47                                               | 1706                      | 1.549866453        |
| Excluded                                  | Falkland Islands (Malvinas)           | Americas              |                                                 |                                               |                                           |                          |                                                      | 0                         | 0                  |
| Excluded                                  | Faroe Islands                         | Europe                |                                                 |                                               |                                           |                          |                                                      | 0                         | 0                  |
|                                           | Fiji                                  | Western Pacific       | 321 (180, 521)                                  | 1258 (603, 2382)                              | 1579.0                                    | 42                       | 46.85                                                | 0                         | 4.761904762        |
|                                           | Finland                               | Europe                | 511 (436, 603)                                  | 2014 (1842, 2200)                             | 24912.0                                   | 4496.17                  | 2525.0                                               | 3995                      | 1.601637765        |
|                                           | France                                | Europe                | 404 (239, 636)                                  | 736 (364, 1404)                               | 1140.0                                    | 2183275                  | 33448.1                                              | 52371                     | 2.398735844        |
| Excluded                                  | French Guiana                         | Americas              |                                                 |                                               |                                           |                          |                                                      | 70                        | 0.624776865        |
| Excluded                                  | French Polynesia                      | Western Pacific       |                                                 |                                               |                                           |                          |                                                      | 75                        | 0.521848038        |
|                                           | Gabon                                 | Africa                | 199 (109, 343)                                  | 925 (466, 1783)                               | 1124.0                                    | 9191                     | 4129.42                                              | 59                        | 0.641932325        |
|                                           | Gambia                                | Africa                | 196 (115, 319)                                  | 1336 (643, 2529)                              | 1532.0                                    | 3742                     | 1548.41                                              | 123                       | 3.287012293        |
|                                           | Georgia                               | Europe                | 112 (64, 189)                                   | 379 (195, 680)                                | 491.0                                     | 139343                   | 34930.35                                             | 1303                      | 0.935102589        |
|                                           | Germany                               | Europe                | 226 (189, 267)                                  | 1404 (1315, 1500)                             | 1630.0                                    | 1067473                  | 17740.78                                             | 16636                     | 3.168446912        |
|                                           | Ghana                                 | Africa                | 268 (149, 446)                                  | 569 (276, 1090)                               | 837.0                                     | 51667                    | 1662.77                                              | 323                       | 0.625157257        |
| Excluded                                  | Gibraltar                             | Europe                |                                                 |                                               |                                           |                          |                                                      | 5                         | 0.493096647        |
|                                           | Greece                                | Europe                | 209 (181, 239)                                  | 400 (195, 750)                                | 609.0                                     | 105271                   | 10099.82                                             | 2406                      | 2.285292728        |
| Excluded                                  | Greenland                             | Europe                |                                                 |                                               |                                           |                          |                                                      | 0                         | 0                  |
|                                           | Grenada                               | Americas              | 254 (136, 407)                                  | 1069 (518, 1947)                              | 1323.0                                    | 41                       | 364.37                                               | 0                         | 0                  |
| Excluded                                  | Guadeloupe                            | Americas              |                                                 |                                               |                                           |                          |                                                      | 149                       | 1.778467415        |
| Excluded                                  | Guam                                  | Western Pacific       |                                                 |                                               |                                           |                          |                                                      | 112                       | 1.665170783        |
|                                           | Guatemala                             | Americas              | 21 (12, 36)                                     | 703 (335, 1263)                               | 724.0                                     | 122062                   | 6813.18                                              | 4171                      | 3.417115892        |
| Excluded                                  | Guernsey                              | Europe                |                                                 |                                               |                                           |                          |                                                      | 13                        | 4.545454545        |
|                                           | Guinea                                | Africa                | 92 (52, 149)                                    | 968 (472, 1831)                               | 1060.0                                    | 13097                    | 997.27                                               | 76                        | 0.580285562        |
|                                           | Guinea-Bissau                         | Africa                | 10 (5, 17)                                      | 1079 (518, 1951)                              | 1089.0                                    | 2422                     | 1230.69                                              | 43                        | 1.775392238        |
|                                           | Guyana                                | Americas              | 228 (127, 381)                                  | 249 (122, 461)                                | 477.0                                     | 5376                     | 6834.89                                              | 150                       | 2.790178571        |
|                                           | Haiti                                 | Americas              | 36 (20, 57)                                     | 841 (412, 1615)                               | 877.0                                     | 9294                     | 815.08                                               | 233                       | 2.506995759        |
| Excluded                                  | Holy See                              | Europe                |                                                 |                                               |                                           |                          |                                                      | 0                         | 0                  |
|                                           | Honduras                              | Americas              | 29 (17, 48)                                     | 153 (74, 273)                                 | 182.0                                     | 107888                   | 10892.71                                             | 2909                      | 2.696314697        |
|                                           | Hungary                               | Europe                | 72 (55, 93)                                     | 562 (266, 604)                                | 634.0                                     | 221073                   | 22884.57                                             | 4977                      | 2.251292559        |
|                                           | Iceland                               | Europe                | 1229 (947, 1557)                                | 1271 (1141, 1415)                             | 2500.0                                    | 5392                     | 15801.06                                             | 26                        | 0.482195846        |
|                                           | India                                 | South-East Asia       | 31 (18, 48)                                     | 552 (270, 1002)                               | 583.0                                     | 9462809                  | 6857.09                                              | 137621                    | 1.4543356          |
|                                           | Indonesia                             | South-East Asia       | 755 (689, 829)                                  | 256 (243, 269)                                | 1011.0                                    | 538883                   | 1970.15                                              | 16945                     | 3.144467352        |
|                                           | Iran (Islamic Republic of)            | Eastern Mediterranean | 50 (38, 64)                                     | 1195 (559, 2257)                              | 1245.0                                    | 962070                   | 11454.18                                             | 48246                     | 5.014811812        |
|                                           | Iraq                                  | Eastern Mediterranean | 44 (25, 70)                                     | 922 (462, 1674)                               | 966.0                                     | 552549                   | 13737.31                                             | 12258                     | 2.184457855        |
|                                           | Ireland                               | Europe                | 97 (66, 138)                                    | 626 (295, 1151)                               | 723.0                                     | 72544                    | 14691.6                                              | 2057                      | 2.830006617        |
| Excluded                                  | Île de Man                            | Europe                |                                                 |                                               |                                           |                          |                                                      | 25                        | 6.775067751        |
|                                           | Israel                                | Europe                | 232 (198, 269)                                  | 2 (2, 2)                                      | 234.0                                     | 335919                   | 38809.73                                             | 2864                      | 0.852586487        |
|                                           | Italy                                 | Europe                | 281 (213, 358)                                  | 713 (346, 1257)                               | 994.0                                     | 1601554                  | 26488.68                                             | 55576                     | 3.470129637        |
|                                           | Jamaica                               | Americas              | 82 (68, 99)                                     | 5542 (5176, 5945)                             | 5624.0                                    | 10763                    | 3634.72                                              | 257                       | 2.38781009         |
| Excluded                                  | Japan                                 | Western Pacific       | 718 (629, 817)                                  | 1224 (1164, 1287)                             | 1942.0                                    | 148694                   | 1175.67                                              | 2139                      | 1.438524756        |
|                                           | Jersey                                | Europe                |                                                 |                                               |                                           |                          |                                                      | 32                        | 3.466955598        |
|                                           | Jordan                                | Eastern Mediterranean | 47 (28, 77)                                     | 1410 (665, 2645)                              | 1457.0                                    | 219430                   | 21506.14                                             | 2751                      | 1.253702775        |
|                                           | Kazakhstan                            | Europe                | 59 (33, 96)                                     | 870 (416, 1580)                               | 929.0                                     | 173806                   | 9256.47                                              | 2477                      | 1.425152181        |
|                                           | Kenya                                 | Africa                | 41 (23, 65)                                     | 217 (101, 399)                                | 258.0                                     | 83618                    | 1555.07                                              | 1469                      | 1.756798775        |
|                                           | Kiribati                              | Western Pacific       | 496 (292, 804)                                  | 183 (88, 345)                                 | 679.0                                     | 0                        | 0                                                    | 0                         | 0                  |
| Excluded                                  | Kosovo[1]                             | Europe                |                                                 |                                               |                                           |                          |                                                      | 1006                      | 2.543422749        |
|                                           | Kuwait                                | Eastern Mediterranean | 76 (43, 127)                                    | 1159 (575, 2228)                              | 1235.0                                    | 142653                   | 33399.51                                             | 880                       | 0.616959372        |
|                                           | Kyrgyzstan                            | Europe                | 44 (26, 72)                                     | 397 (191, 734)                                | 441.0                                     | 73178                    | 11216.4                                              | 1275                      | 1.742326929        |
|                                           | Lao People's Democratic Republic      | Western Pacific       | 489 (275, 776)                                  | 223 (107, 416)                                | 712.0                                     | 39                       | 5.36                                                 | 0                         | 0                  |
|                                           | Latvia                                | Europe                | 180 (158, 207)                                  | 1665 (774, 3203)                              | 1845.0                                    | 17075                    | 9052.                                                |                           |                    |

|          |                                                |                       |                   |                   |        |          |          |        |             |
|----------|------------------------------------------------|-----------------------|-------------------|-------------------|--------|----------|----------|--------|-------------|
|          | Liberia                                        | Africa                | 51 (29, 85)       | 461 (224, 867)    | 512.0  | 1598     | 315.96   | 83     | 5.193992491 |
|          | Libya                                          | Eastern Mediterranean | 60 (35, 101)      | 1265 (632, 2343)  | 1325.0 | 82809    | 12051.45 | 1183   | 1.42858868  |
| Excluded | Liechtenstein                                  | Europe                |                   |                   | 1302   |          | 34140.07 | 15     | 1.152073733 |
|          | Lithuania                                      | Europe                | 230 (194, 270)    | 1253 (628, 2276)  | 1483.0 | 62515    | 22964.13 | 519    | 0.830200752 |
|          | Luxembourg                                     | Europe                | 233 (159, 328)    | 390 (186, 724)    | 623.0  | 34538    | 55174.46 | 312    | 0.903352829 |
|          | Madagascar                                     | Africa                | 72 (44, 120)      | 590 (285, 1093)   | 662.0  | 17341    | 626.23   | 251    | 1.44736711  |
|          | Malawi                                         | Africa                | 52 (29, 85)       | 393 (195, 746)    | 445.0  | 6028     | 315.11   | 185    | 3.069011281 |
|          | Malaysia                                       | Western Pacific       | 988 (559, 1613)   | 387 (189, 737)    | 1375.0 | 65697    | 2029.82  | 360    | 0.547970227 |
|          | Maldives                                       | South-East Asia       | 3886 (2106, 6641) | 215 (106, 392)    | 4101.0 | 13011    | 24070.2  | 46     | 0.353546999 |
|          | Mali                                           | Africa                | 76 (53, 103)      | 667 (327, 1228)   | 743.0  | 4688     | 231.5    | 152    | 3.242320819 |
|          | Malta                                          | Europe                | 279 (217, 362)    | 402 (200, 780)    | 681.0  | 9873     | 22360.22 | 137    | 1.38762281  |
|          | Marshall Islands                               | Western Pacific       | 388 (225, 629)    | 430 (207, 820)    | 818.0  | 4        | 67.57    | 0      | 0           |
| Excluded | Martinique                                     | Americas              |                   |                   |        | 5486     | 14619    | 40     | 0.729128691 |
|          | Mauritania                                     | Africa                | 142 (78, 235)     | 832 (404, 1532)   | 974.0  | 8424     | 1811.75  | 172    | 2.041785375 |
|          | Mauritius                                      | Africa                | 395 (224, 609)    | 1326 (634, 2558)  | 1721.0 | 504      | 396.3    | 10     | 1.984126984 |
| Excluded | Mayotte                                        | Africa                |                   |                   |        | 5181     | 18990.89 | 49     | 0.945763366 |
|          | Mexico                                         | Americas              | 39 (36, 43)       | 464 (444, 485)    | 503.0  | 1107071  | 8586.42  | 105655 | 9.543651672 |
|          | Micronesia (Federated States of)               | Western Pacific       | 368 (216, 575)    | 374 (179, 696)    | 742.0  | 0        | 0        | 0      | 0           |
| Excluded | Monaco                                         | Europe                |                   |                   |        | 609      | 15518.8  | 0      | 0.492610837 |
|          | Mongolia                                       | Western Pacific       | 15 (9, 25)        | 557 (282, 1011)   | 572.0  | 791      | 241.28   | 0      | 0           |
|          | Montenegro                                     | Europe                | 75 (50, 106)      | 293 (139, 566)    | 368.0  | 35366    | 56309.37 | 499    | 1.410595967 |
| Excluded | Montserrat                                     | Americas              |                   |                   |        | 13       | 2600.52  | 1      | 7.692307692 |
|          | Morocco                                        | Eastern Mediterranean | 63 (36, 98)       | 1283 (614, 2274)  | 1346.0 | 356335   | 9654.01  | 5846   | 1.640591017 |
|          | Mozambique                                     | Africa                | 25 (23, 28)       | 679 (330, 1249)   | 704.0  | 15701    | 502.34   | 131    | 0.834341762 |
|          | Myanmar                                        | South-East Asia       | 620 (360, 1034)   | 593 (282, 1127)   | 1213.0 | 89486    | 1644.67  | 1918   | 2.143532033 |
|          | Namibia                                        | Other                 | 23 (13, 37)       | 233 (115, 450)    | 256.0  | 14380    | 3659.4   | 152    | 1.057023644 |
| Excluded | Nauru                                          | Western Pacific       |                   |                   |        | 0        | 0        | 0      | 0           |
|          | Nepal                                          | South-East Asia       | 20 (15, 27)       | 468 (233, 936)    | 488.0  | 233452   | 8012.27  | 1508   | 0.645957199 |
|          | Netherlands                                    | Europe                | 180 (158, 202)    | 640 (316, 1179)   | 820.0  | 522835   | 30512.92 | 9363   | 1.790813545 |
| Excluded | New Caledonia                                  | Western Pacific       |                   |                   |        | 33       | 115.59   | 0      | 0           |
|          | New Zealand                                    | Western Pacific       | 374 (215, 602)    | 1041 (497, 1970)  | 1415.0 | 1703     | 353.16   | 25     | 1.467997651 |
|          | Nicaragua                                      | Americas              | 37 (21, 62)       | 542 (270, 998)    | 579.0  | 4629     | 698.76   | 160    | 3.45647008  |
|          | Niger                                          | Africa                | 28 (15, 47)       | 389 (187, 721)    | 417.0  | 1548     | 63.95    | 72     | 4.651162791 |
|          | Nigeria                                        | Africa                | 64 (37, 106)      | 834 (416, 1514)   | 898.0  | 67557    | 327.72   | 1178   | 1.736311558 |
| Excluded | Niue                                           | Western Pacific       |                   |                   |        | 0        | 0        | 0      | 0           |
|          | North Macedonia                                | Europe                | 59 (34, 95)       | 1316 (627, 2495)  | 1375.0 | 61878    | 29700.77 | 1763   | 2.849154788 |
| Excluded | Northern Mariana Islands (Commonwealth of the) | Western Pacific       |                   |                   |        | 106      | 1841.65  | 2      | 1.886792453 |
|          | Norway                                         | Europe                | 596 (518, 683)    | 1076 (1004, 1152) | 1672.0 | 35826    | 6608.45  | 332    | 0.926701278 |
|          | occupied Palestinian territory                 | Eastern Mediterranean | 8 (4, 14)         | 973 (474, 1789)   | 981.0  | 98850    | 19376.98 | 827    | 0.831562974 |
|          | Oman                                           | Eastern Mediterranean | 45 (25, 74)       | 1181 (553, 2282)  | 1226.0 | 123599   | 24223.23 | 1423   | 1.103373063 |
| Excluded | Other                                          | Other                 |                   |                   |        | 741      | 0        | 13     | 1.754385965 |
|          | Pakistan                                       | Eastern Mediterranean | 16 (9, 26)        | 277 (136, 514)    | 239.0  | 398024   | 1801.89  | 8025   | 2.016210078 |
| Excluded | Palau                                          | Western Pacific       |                   |                   |        | 0        | 0        | 0      | 0           |
|          | Panama                                         | Americas              | 130 (75, 210)     | 667 (329, 1215)   | 797.0  | 164729   | 38177.96 | 3060   | 1.857596416 |
|          | Papua New Guinea                               | Western Pacific       | 294 (164, 493)    | 303 (146, 586)    | 597.0  | 656      | 73.32    | 7      | 1.067073171 |
|          | Paraguay                                       | Americas              | 62 (36, 101)      | 1575 (800, 2964)  | 1637.0 | 81906    | 11483.43 | 1743   | 2.128049227 |
|          | Peru                                           | Americas              | 147 (85, 243)     | 807 (407, 1506)   | 954.0  | 962530   | 29192.47 | 35923  | 3.732143414 |
|          | Philippines                                    | Western Pacific       | 590 (533, 650)    | 131 (62, 244)     | 721.0  | 431630   | 3938.91  | 8392   | 1.944257813 |
| Excluded | Pitcairn Islands                               | Western Pacific       |                   |                   |        | 0        | 0        | 0      | 0           |
|          | Poland                                         | Europe                | 107 (86, 133)     | 1250 (1156, 1362) | 1357.0 | 990811   | 26179.65 | 17150  | 1.73905289  |
|          | Portugal                                       | Europe                | 582 (472, 711)    | 604 (297, 1095)   | 1186.0 | 298061   | 29231.1  | 4505   | 1.511435579 |
| Excluded | Puerto Rico                                    | Americas              |                   |                   |        | 52545    | 18366.9  | 1106   | 2.104862499 |
|          | Qatar                                          | Eastern Mediterranean | 50 (27, 83)       | 1505 (682, 2900)  | 1555.0 | 138833   | 48188.28 | 237    | 0.170708693 |
| Excluded | RAEUnion                                       | Africa                |                   |                   |        | 8054     | 8995.75  | 40     | 0.495647629 |
|          | Republic of Korea                              | Western Pacific       | 708 (633, 796)    | 883 (421, 1609)   | 1591.0 | 34652    | 675.88   | 576    | 1.517940902 |
|          | Republic of Moldova                            | Europe                | 108 (61, 173)     | 613 (297, 1108)   | 721.0  | 107364   | 26615.02 | 2304   | 2.145970716 |
|          | Romania                                        | Europe                | 61 (34, 97)       | 1335 (642, 2401)  | 1396.0 | 475362   | 24709.93 | 11331  | 2.383657087 |
|          | Russian Federation                             | Europe                | 180 (155, 206)    | 992 (487, 1867)   | 1112.0 | 232056   | 15911.64 | 40464  | 1.742593633 |
|          | Rwanda                                         | Africa                | 18 (10, 29)       | 303 (157, 539)    | 321.0  | 5934     | 458.15   | 49     | 0.825749916 |
| Excluded | Saint Barthélemy                               | Americas              |                   |                   |        | 152      | 15376.83 | 0      | 0           |
| Excluded | Saint Helena                                   | Africa                |                   |                   |        | 0        | 0        | 0      | 0           |
| Excluded | Saint Kitts and Nevis                          | Americas              |                   |                   |        | 22       | 413.6    | 0      | 0           |
|          | Saint Lucia                                    | Americas              | 263 (156, 427)    | 129 (55, 254)     | 392.0  | 257      | 1399.58  | 2      | 0.778210117 |
| Excluded | Saint Martin                                   | Americas              |                   |                   |        | 744      | 19245.2  | 12     | 1.612903226 |
| Excluded | Saint Pierre and Miquelon                      | Americas              |                   |                   |        | 14       | 2415.88  | 0      | 0           |
|          | Saint Vincent and the Grenadines               | Americas              | 114 (66, 184)     | 702 (335, 1304)   | 816.0  | 85       | 766.18   | 0      | 0           |
|          | Samoa                                          | Western Pacific       | 521 (312, 837)    | 152 (77, 288)     | 673.0  | 0        | 0        | 0      | 0           |
| Excluded | San Marino                                     | Europe                |                   |                   |        | 1612     | 47498.38 | 46     | 2.853598015 |
|          | Sao Tome and Principe                          | Other                 | 200 (115, 318)    | 792 (385, 1531)   | 992.0  | 991      | 4521.83  | 17     | 1.715438951 |
|          | Saudi Arabia                                   | Eastern Mediterranean | 58 (34, 93)       | 656 (328, 1193)   | 714.0  | 357360   | 10264.87 | 5896   | 1.649876875 |
|          | Senegal                                        | Africa                | 229 (126, 372)    | 2183 (1046, 3958) | 2412.0 | 16089    | 960.89   | 333    | 2.069737087 |
|          | Serbia                                         | Europe                | 57 (37, 82)       | 1020 (515, 1825)  | 1077.0 | 175438   | 25192.98 | 1604   | 0.914283109 |
|          | Seychelles                                     | Africa                | 1291 (740, 2144)  | 637 (301, 1203)   | 1928.0 | 172      | 1748.91  | 0      | 0           |
|          | Sierra Leone                                   | Africa                | 205 (115, 346)    | 487 (239, 884)    | 692.0  | 2412     | 302.37   | 74     | 3.067993367 |
|          | Singapore                                      | Western Pacific       | 49 (44, 54)       | 887 (454, 1621)   | 936.0  | 58218    | 9951.21  | 29     | 0.049812773 |
| Excluded | Sint Maarten                                   | Americas              |                   |                   |        | 1066     | 24854.92 | 25     | 0.74521576  |
|          | Slovakia                                       | Europe                | 59 (39, 86)       | 1253 (609, 2252)  | 1312.0 | 105929   | 19402.19 | 839    | 0.792039951 |
|          | Slovenia                                       | Europe                | 69 (45, 101)      | 1355 (665, 2535)  | 1424.0 | 75814    | 36467.66 | 948    | 1.250428681 |
|          | Solomon Islands                                | Western Pacific       | 412 (238, 668)    | 102 (47, 191)     | 514.0  | 17       | 24.75    | 0      | 0           |
|          | Somalia                                        | Eastern Mediterranean | 48 (27, 79)       | 337 (160, 614)    | 385.0  | 4451     | 280.06   | 113    | 2.538755336 |
|          | South Africa                                   | Africa                | 14 (13, 15)       | 683 (652, 717)    | 697.0  | 790004   | 13320.21 | 21535  | 2.725935565 |
| Excluded | South Sudan                                    | Africa                |                   |                   |        | 3109     | 277.74   | 61     | 1.962045674 |
|          | Spain                                          | Europe                | 647 (512, 807)    | 874 (414, 1556)   | 1521.0 | 1648187  | 35251.73 | 45069  | 2.734459136 |
|          | Sri Lanka                                      | South-East Asia       | 720 (401, 1158)   | 106 (52, 189)     | 826.0  | 23484    | 1096.7   | 116    | 0.49395333  |
|          | Sudan                                          | Eastern Mediterranean | 17 (9, 26)        | 526 (254, 981)    | 543.0  | 17810    | 406.16   | 1249   | 7.012914093 |
|          | Suriname                                       | Americas              | 133 (75, 222)     | 1308 (623, 2389)  | 1441.0 | 5312     | 9055.08  | 117    | 2.202560241 |
|          | Sweden                                         | Europe                | 400 (348, 466)    | 1355 (1267, 1459) | 1755.0 | 243129   | 24073.93 | 6681   | 2.747923942 |
|          | Switzerland                                    | Europe                | 212 (120, 339)    | 508 (241, 947)    | 720.0  | 325770   | 37641.16 | 4430   | 1.359855113 |
|          | Syrian Arab Republic                           | Eastern Mediterranean | 17 (10, 28)       | 1134 (552, 2061)  | 1151.0 | 7887     | 450.67   | 417    | 5.287181438 |
|          | Tajikistan                                     | Europe                | 19 (11, 32)       | 1134 (562, 2138)  | 1153.0 | 12194    | 1278.51  | 86     | 0.705264884 |
|          | Thailand                                       | South-East Asia       | 824 (477, 1349)   | 506 (242, 961)    | 1330.0 | 3998     | 57.28    | 60     | 1.500790375 |
|          | The United Kingdom                             | Europe                | 318 (268, 371)    | 2414 (1261, 2568) | 2732.0 | 1629661  | 24005.84 | 58448  | 3.586512778 |
|          | Timor-Leste                                    | South-East Asia       | 25 (12, 47)       | 204 (100, 369)    | 229.0  | 30       | 22.75    | 0      | 0           |
|          | Togo                                           | Africa                | 94 (53, 153)      | 566 (262, 1050)   | 660.0  | 2946     | 355.85   | 64     | 2.172437203 |
| Excluded | Tokelau                                        | Western Pacific       |                   |                   |        | 0        | 0        | 0      | 0           |
|          | Tonga                                          | Western Pacific       | 441 (257, 725)    | 464 (226, 874)    | 905.0  | 0        | 0        | 0      | 0           |
|          | Trinidad and Tobago                            | Americas              | 22 (19, 25)       | 996 (482, 1857)   | 1018.0 | 6560     | 4758.88  | 120    | 1.801801802 |
|          | Tunisia                                        | Eastern Mediterranean | 84 (49, 135)      | 2215 (1096, 4050) | 2299.0 | 96769    | 8187.84  | 3260   | 1.368847461 |
|          | Turkey                                         | Europe                | 377 (304, 459)    | 1501 (1381, 1648) | 1878.0 | 500865   | 5938.71  | 13746  | 2.744452098 |
|          | Turkmenistan                                   | Europe                | 67 (37, 113)      | 570 (275, 1058)   | 637.0  | 0        | 0        | 0      | 0           |
| Excluded | Turks and Caicos Islands                       | Americas              |                   |                   |        | 748      | 19319.18 | 6      | 0.802139037 |
| Excluded | Tuvalu                                         | Western Pacific       |                   |                   |        | 0        | 0        | 0      | 0           |
|          | Uganda                                         | Africa                | 113 (63, 185)     | 557 (267, 1028)   | 670.0  | 20459    | 447.28   | 205    | 1.002004008 |
|          | Ukraine                                        | Europe                | 180 (103, 287)    | 1057 (524, 1916)  | 1237.0 | 745123   | 17037.71 | 12548  | 1.68401727  |
|          | United Arab Emirates                           | Eastern Mediterranean | 78 (43, 137)      | 962 (446, 1835)   | 1040.0 | 168860   | 17073.12 | 572    | 0.847021513 |
|          | United Republic of Tanzania                    | Africa                | 69 (40, 111)      | 339 (167, 641)    | 408.0  | 509      | 8.52     | 21     | 4.125736739 |
|          | United States of America                       | Americas              | 141 (128, 157)    | 1527 (1456, 1599) | 1668.0 | 13234551 | 39983.22 | 264808 | 2.000883899 |
| Excluded | United States Virgin Islands                   | Americas              |                   |                   |        | 1544     | 14785.73 | 23     | 1.489637306 |
|          | Uruguay                                        | Americas              | 69 (39, 113)      | 1384 (661, 2546)  | 1453.0 | 5716     | 1645.49  | 76     | 1.32960112  |
|          | Uzbekistan                                     | Europe                | 15 (9, 24)        | 773 (374, 1428)   | 788.0  | 73094    | 2183.92  | 610    | 0.834541823 |
|          | Vanuatu                                        | Western Pacific       | 353 (202, 577)    | 333 (163, 639)    | 686.0  | 0        | 3.26     | 0      | 0           |
|          | Venezuela (Bolivarian Republic of)             | Americas              | 121 (71, 192)     | 994 (484, 1800)   | 1115.0 | 102040   | 3588.42  | 894    | 0.876127009 |
|          | Viet Nam                                       | Western Pacific       | 574 (331, 941)    | 278 (130, 520)    | 852.0  | 1347     | 13.84    | 35     | 2.598366741 |
| Excluded | Wallis and Futuna                              | Western Pacific       |                   |                   |        | 3        | 26.76    | 0      | 0           |
|          | Yemen                                          | Eastern Mediterranean | 52 (30, 86)       | 362 (167, 668)    | 414.0  | 2081     | 69.77    | 606    | 29.12061509 |
|          | Zambia                                         | Africa                | 68 (40, 112)      | 612 (309, 1091)   | 680.0  | 17647    | 959.91   | 357    | 2.023006743 |
|          | Zimbabwe                                       | Africa                | 5 (3, 7)          | 630 (312, 1230)   | 635.0  | 10034    | 675.1    | 277    | 2.760613913 |

\*Based on eTable 3. Mean dietary saturated fat, omega-6 polyunsaturated fat, trans fat, cholesterol.
