# Supplementary material for: In Silico Study of Polyunsaturated Fatty Acids as Potential SARS-CoV-2 Spike Protein Closed Conformation Stabilizers: Epidemiological and Computational Approaches
Source: MDPI journal article supplement (doi:10.3390/molecules26030711), 2021-01-29
Supplement: s1 [file s1]

Table S2. Docking results of the fatty acid library

|                                                |                 |                                                         | Yasara structure (Kcal/mol) |                   | Molegro Virtual Docker (score) |                   |
|------------------------------------------------|-----------------|---------------------------------------------------------|-----------------------------|-------------------|--------------------------------|-------------------|
| Common name                                    | Fatty acid type | Name                                                    | Closed conformation         | Open conformation | Closed conformation            | Open conformation |
| Tetracosahexaenoic acid (Nisinic acid)         | 24:6 (n-3)      | <i>all-cis</i> -6,9,12,15,18,21-tetracosahexaenoic acid | 9.43                        | 4.78              | -122.07                        | -77.47            |
| Tetracosapentaenoic acid                       | 24:5 (n-6)      | <i>all-cis</i> -6,9,12,15,18-tetracosapentaenoic acid   | 8.58                        | 4.54              | -124.34                        | -97.01            |
| Tetracosapentaenoic acid                       | 24:5 (n-3)      | <i>all-cis</i> -9,12,15,18,21-tetracosapentaenoic acid  | 8.98                        | 4.56              | -125.94                        | -94.46            |
| Tetracosatetraenoic acid                       | 24:4 (n-6)      | <i>all-cis</i> -9,12,15,18-tetracosatetraenoic acid     | 8.40                        | 4.46              | -114.84                        | -83.79            |
| Nervonic acid†                                 | 24:1 (n-9)      | <i>cis</i> -15-tetracosenoic acid                       | 7.91                        | 4.41              | -111.70                        | -76.45            |
| Docosahexaenoic acid (DHA, Cervonic acid)      | 22:6 (n-3)      | <i>all-cis</i> -4,7,10,13,16,19-docosahexaenoic acid    | 8.87                        | 4.72              | -117.85                        | -79.01            |
| Docosapentaenoic acid (Osbond acid)            | 22:5 (n-6)      | <i>all-cis</i> -4,7,10,13,16-docosapentaenoic acid      | 8.69                        | 4.84              | -103.09                        | -77.88            |
| Docosapentaenoic acid (DPA, Clupanodonic acid) | 22:5 (n-3)      | <i>all-cis</i> -7,10,13,16,19-docosapentaenoic acid     | 8.51                        | 4.73              | -115.80                        | -88.64            |
| Adrenic acid (Ada)                             | 22:4 (n-6)      | <i>all-cis</i> -7,10,13,16-docosatetraenoic acid        | 8.67                        | 4.68              | -121.12                        | -87.74            |
| Docosadienoic acid                             | 22:2 (n-6)      | <i>all-cis</i> -13,16-docosadienoic acid                | 7.86                        | 4.09              | -108.34                        | -72.63            |
| Erucic acid†                                   | 22:1 (n-9)      | <i>cis</i> -13-docosenoic acid                          | 7.72                        | 4.49              | -112.10                        | -80.60            |
| Heneicosapentaenoic acid (HPA)                 | 21:5 (n-3)      | <i>all-cis</i> -6,9,12,15,18-heneicosapentaenoic acid   | 8.74                        | 4.91              | -117.33                        | -88.76            |
| Bosseoapentaenoic acid                         | 20:5 (n-6)      | 5Z,8Z,10E,12E,14Z-eicosapentaenoic acid                 | 8.59                        | 4.78              | -100.08                        | -78.25            |
| Eicosapentaenoic acid (EPA, Timnodonic acid)   | 20:5 (n-3)      | <i>all-cis</i> -5,8,11,14,17-eicosapentaenoic acid      | 8.58                        | 5.56              | -98.14                         | -77.58            |
| Arachidonic acid (AA)                          | 20:4 (n-6)      | <i>all-cis</i> -5,8,11,14-eicosatetraenoic acid         | 8.24                        | 4.80              | -105.16                        | -70.68            |
| Eicosatetraenoic acid (ETA)                    | 20:4 (n-3)      | <i>all-cis</i> -8,11,14,17-eicosatetraenoic acid        | 8.09                        | 5.30              | -107.78                        | -81.92            |
| Mead acid                                      | 20:3 (n-9)      | <i>all-cis</i> -5,8,11-eicosatrienoic acid              | 7.66                        | 4.54              | -107.58                        | -71.24            |
| Dihomo-gamma-linolenic acid (DGLA)             | 20:3 (n-6)      | <i>all-cis</i> -8,11,14-eicosatrienoic acid             | 8.23                        | 4.46              | -107.29                        | -70.14            |
| scladonic acid                                 | 20:3 (n-6)      | (5Z,11Z,14Z)-eicosa-5,11,14-trienoic acid               | 7.99                        | 4.68              | -113.59                        | -80.21            |
| Eicosatrienoic acid (ETE)                      | 20:3 (n-3)      | <i>all-cis</i> -11,14,17-eicosatrienoic acid            | 7.66                        | 4.60              | -113.03                        | -78.71            |
| Eicosadienoic acid                             | 20:2 (n-6)      | <i>all-cis</i> -11,14-eicosadienoic acid                | 7.50                        | 4.47              | -103.16                        | -71.95            |
| Eicosenoic acid gondoic                        | 20:1 (n-9)      | <i>cis</i> -11-eicosenoic acid                          | 7.44                        | 5.11              | -105.12                        | -73.09            |
| Stearidonic acid (SDA)                         | 18:4 (n-3)      | <i>all-cis</i> -6,9,12,15,-octadecatetraenoic acid      | 8.14                        | 4.80              | -97.99                         | -74.83            |
| α-Parinaric acid                               | 18:4 (n-3)      | 9E,11Z,13Z,15E-octadeca-9,11,13,15-tetraenoic acid      | 8.14                        | 4.71              | -103.78                        | -81.08            |
| β-Parinaric acid                               | 18:4 (n-3)      | <i>all trans</i> -octadeca-9,11,13,15-tetraenoic acid   | 7.80                        | 5.78              | -107.30                        | -77.93            |
| β-Calendic acid                                | 18:3 (n-6)      | 8E,10E,12E-octadecatrienoic acid                        | 8.19                        | 5.41              | -106.77                        | -71.35            |
| Pinolenic acid                                 | 18:3 (n-6)      | (5Z,9Z,12Z)-octadeca-5,9,12-trienoic acid               | 8.10                        | 5.74              | -104.43                        | -76.07            |
| Gamma-linolenic acid (GLA)                     | 18:3 (n-6)      | <i>all-cis</i> -6,9,12-octadecatrienoic acid            | 7.59                        | 4.71              | -104.40                        | -82.38            |
| α-Calendic acid                                | 18:3 (n-6)      | 8E,10E,12Z-octadecatrienoic acid                        | 7.46                        | 5.53              | -108.65                        | -75.28            |
| Jacaric acid                                   | 18:3 (n-6)      | 8Z,10E,12Z-octadecatrienoic acid                        | 7.45                        | 4.53              | -101.70                        | -83.14            |
| Catalpic acid                                  | 18:3 (n-5)      | 9Z,11Z,13E-octadeca-9,11,13-trienoic acid               | 7.49                        | 5.39              | -106.06                        | -75.94            |
| β-Eleostearic acid                             | 18:3 (n-5)      | 9E,11E,13E-octadeca-9,11,13-trienoic acid               | 7.47                        | 5.12              | -107.11                        | -73.96            |
| α-Eleostearic acid                             | 18:3 (n-5)      | 9Z,11E,13E-octadeca-9,11,13-trienoic acid               | 7.45                        | 4.61              | -108.16                        | -86.64            |
| Punicic acid                                   | 18:3 (n-5)      | 9Z,11E,13Z-octadeca-9,11,13-trienoic acid               | 7.44                        | 4.69              | -102.76                        | -76.17            |
| Rumelenic acid                                 | 18:3 (n-3)      | 9E,11Z,15E-octadeca-9,11,15-trienoic acid               | 7.97                        | 4.24              | -104.27                        | -77.21            |
| Alpha-linolenic acid (ALA)                     | 18:3 (n-3)      | <i>all-cis</i> -9,12,15-octadecatrienoic acid           | 7.50                        | 4.54              | -101.73                        | -79.05            |
| Rumenic acid                                   | 18:2 (n-7)      | 9Z,11E-octadeca-9,11-dienoic acid                       | 7.21                        | 4.44              | -102.88                        | -75.73            |
| isorumenic acid                                | 18:2 (n-6)      | 10E,12Z-octadeca-10,12-dienoic acid                     | 7.27                        | 4.42              | -98.68                         | -82.21            |
| Linoleic acid (LA)                             | 18:2 (n-6)      | <i>all-cis</i> -9,12-octadecadienoic acid               | 6.79                        | 4.37              | -104.76                        | -79.61            |
| Oleic acid†                                    | 18:1 (n-9)      | <i>cis</i> -9-octadecenoic acid                         | 7.11                        | 4.98              | -105.92                        | -81.34            |
| Hexadecatrienoic acid (HTA)                    | 16:3 (n-3)      | <i>all-cis</i> -7,10,13-hexadecatrienoic acid           | 7.69                        | 5.25              | -96.74                         | -81.09            |
| Lignoceric acid                                | 24:0            | Tetracosanoic acid                                      | 8.02                        | 4.10              | -110.18                        | -72.26            |
| Behenic acid                                   | 22:0            | Docosanoic acid                                         | 7.37                        | 4.09              | -109.07                        | -72.02            |
| Arachidic acid                                 | 20:0            | Eicosanoic acid                                         | 6.59                        | 4.19              | -108.26                        | -73.12            |
| Stearic acid                                   | 18:0            | Octadecanoic acid                                       | 6.45                        | 4.16              | -103.98                        | -76.91            |
| Palmitic acid                                  | 16:0            | Hexadecanoic acid                                       | 7.16                        | 4.94              | -93.98                         | -70.38            |
